1  
2 Neurogenetic Mechanisms of Risk for ADHD: Examining Associations of Functionally-  
3 Annotated Polygenic Scores and Brain Volumes in a Population Cohort  
4

5  
6 Quanfa He<sup>1,2</sup>, Taylor Keding<sup>3</sup>, Qi Zhang<sup>4</sup>, Jiacheng Miao<sup>5</sup>, Ryan J. Herringa<sup>6</sup>, Qiongshi Lu<sup>5,7,8</sup>,  
7 Brittany G. Travers<sup>2,9</sup>, and James J. Li<sup>1,2,6</sup>  
8

9 <sup>1</sup> Department of Psychology, University of Wisconsin-Madison

10 <sup>2</sup> Waisman Center, University of Wisconsin-Madison

11 <sup>3</sup> Department of Psychology, Yale University

12 <sup>4</sup> Department of Educational Psychology, University of Wisconsin-Madison

13 <sup>5</sup> Department of Biostatistics and Medical Informatics, University of Wisconsin-Madison

14 <sup>6</sup> Department of Psychiatry, University of Wisconsin School of Medicine and Public Health,  
15 Madison, Wisconsin; Neuroscience Training Program, University of Wisconsin-Madison,  
16 Madison, Wisconsin.

17 <sup>7</sup> Center for Demography of Health and Aging, University of Wisconsin-Madison

18 <sup>8</sup> Department of Statistics, University of Wisconsin-Madison

19 <sup>9</sup> Occupational Therapy Program in the Department of Kinesiology, University of Wisconsin-  
20 Madison

21 Corresponding Author

- 22 Please address all correspondence and reprint requests to James J. Li, Ph.D., Department of  
23 Psychology, 1202 W. Johnson Street, Madison, WI 53706. Tel: (608) 265-1091, Email:  
24 [james.li@wisc.edu](mailto:james.li@wisc.edu).



48 portions of the manuscript, and provided substantive feedback on drafts of the manuscript. All  
49 authors reviewed and approved the final manuscript for submission.

50 ***Competing interests***

51 The authors declare no competing interests

52 ***Acknowledgements***

53 Not applicable

54 ***Author information***

55 Quanfa He, qhe37@wisc.edu

56 Taylor Keding, tjkening@gmail.com

57 Qi Zhang, qzhang384@wisc.edu

58 Jiacheng Miao, jmiao24@wisc.edu

59 Ryan J. Herringa, herringa@wisc.edu

60 Qiongshi Lu, qlu@biostat.wisc.edu

61 Brittany G. Travers, btravers@wisc.edu

62 James J. Li, james.li@wisc.edu

## Abstract

63  
64 **Background:** ADHD polygenic scores (PGS) are reliably predictive of ADHD outcomes across  
65 studies. However, traditional PGS are *statistical* indices of genetic liability – predictive of  
66 ADHD but uninformed by *biological* information. The objective of our study was to determine  
67 whether a novel, biologically-informed, functionally annotated ADHD PGS can reveal specific  
68 brain mechanisms of risk for ADHD. **Methods:** Data were from the Philadelphia  
69 Neurodevelopmental Cohort ( $n=555$ ). Multiple mediation models were tested to examine the  
70 indirect effects of ADHD PGS (including one using a functionally annotated approach, i.e.,  
71 *AnnoPred*) on ADHD inattention (IA) and hyperactivity-impulsivity (HI) symptoms, via gray  
72 matter volumes in the cingulate gyrus, angular gyrus, caudate, dorsolateral prefrontal cortex  
73 (DLPFC), and inferior temporal lobe. Age-stratified analyses (children, adolescents, and young  
74 adults) were also conducted to account for developmental differences. **Results:** A direct effect  
75 was detected between *AnnoPred* PGS and IA symptoms in adolescents only. No indirect effects  
76 via brain volumes were detected for either IA or HI symptoms. However, ADHD PGS were  
77 consistently associated with the DLPFC. **Conclusions:** A biologically-informed PGS yielded a  
78 more powerful (and developmentally-specific) signal in detecting a direct effect of ADHD PGS  
79 on adolescent IA symptoms. However, no indirect effects between ADHD PGS and ADHD  
80 symptomology via the brain emerged. ADHD will become increasingly predictive as discovery  
81 sample sizes climb. Studies that integrate both genetic and neuroimaging information are critical  
82 to advancing our understanding of the biological mechanisms underlying ADHD.

83 **Keywords:** *ADHD; polygenic scores; brain volume; functional annotations; multiple mediation*

84

85 Neurogenetic Mechanisms of Risk for ADHD: Examining Associations of Functionally-  
86 Annotated Polygenic Scores and Brain Volumes in a Population Cohort

87 Attention-deficit/hyperactivity disorder (ADHD) is a neurodevelopmental disorder that  
88 affects 3% - 6% of youths and adults worldwide (1,2). Genes explain a substantial proportion of  
89 variability in ADHD (3), accounting for an estimated 70 to 80% of its variation (4,5). Genome-  
90 wide associations studies (GWAS) identified genetic variants that are associated with ADHD,  
91 including several replicated loci across diverse samples (7,8). However, the biological  
92 significance of these loci, particularly as they pertain to the structure and/or function of measured  
93 brain-based markers, have yet to be examined in human studies.

94 ADHD is a highly polygenic disorder, in which there are many genes of individual small  
95 effects that contribute to its etiology (3,9,10). Polygenic scores (PGS) are widely used in  
96 characterizing a person's polygenic risk for a trait of interest (11). PGS are traditionally  
97 computed as the sum of the number of risk alleles at each genetic loci weighted by their effect  
98 sizes, which are extracted from summary statistics of a GWAS conducted in an independent  
99 sample. In two recent meta-analyses, traditional ADHD PGS reliably predicted ADHD outcomes  
100 across samples and populations, explaining as much as 4% of the variance (3,10). By comparison,  
101 the most statistically significant genetic variant in the ADHD GWAS itself only accounted for .1%  
102 of the variance in ADHD (7). Notably, the predictive power of PGS is expected to grow as  
103 GWAS sample sizes for ADHD increase over time (3).

104 However, enthusiasm around the use of ADHD PGS may need to be tempered by the fact  
105 that they are statistically-derived (using GWAS summary statistics) predictors with unknown  
106 biological plausibility (3). A functional annotation of the ADHD GWAS showed that genetic  
107 variants associated with ADHD were significantly overrepresented in regulatory regions of DNA

108 in cells in the anterior caudate, cingulate gyrus, angular gyrus, dorsolateral prefrontal cortex  
109 (DLPFC), and inferior temporal lobe, suggesting that ADHD-associated variants may involve the  
110 regulation of gene expression in these five brain regions (7). Furthermore, several of the GWAS-  
111 identified ADHD genes (e.g., *SORCS3*, *DUSP6*, *SEMA6D*) are involved in neurotransmission,  
112 neuronal development, and neuronal plasticity, suggesting the plausibility of brain-based  
113 mechanisms underlying ADHD PGS via genetic effects. However, biological annotations of  
114 GWAS are not traditionally incorporated in computations of PGS.

115 To leverage functional annotation information, we employed a novel method known as  
116 *AnnoPred*, which upweights genetic variants located in annotation categories that are  
117 overrepresented in GWAS (12). Annotation categories included enhancers, promoters, conserved  
118 region, coding region, transcription factor binding sites, and cell-type specific epigenomic marks  
119 in central nervous system, immune system, cardiovascular system, gastrointestinal system, and  
120 skeletal muscles. Upweighted genetic variants are considered more functionally relevant (by  
121 effect size) for a trait of interest. In simulated and empirical data, this method demonstrated  
122 improved accuracy in disease stratification compared to other PGS methods (12).

123 In addition to gene enrichment findings from ADHD GWAS (7), other possible gene-  
124 brain mechanisms in ADHD come from the broader neuroimaging literature (6,13). Several  
125 studies have reported associations between smaller regional volumes in areas such as the caudate,  
126 prefrontal cortex, temporal lobe, cingulate cortex, and cerebellum in samples of children and  
127 adolescents with ADHD relative to controls (14–17). In particular, the caudate and dorsolateral  
128 prefrontal cortex have been extensively implicated in ADHD studies (18–21). The caudate  
129 nucleus is involved in motor movement, associative learning, memory, and goal-directed  
130 behavior, and was found to be coactive with the DLPFC and anterior cingulate cortex during a

131 range of cognitive and motor tasks (22). The DLPFC is linked to higher level cognitive function  
132 such as inhibition, planning, and working memory (23). Significantly smaller caudate nucleus  
133 and DLPFC have been documented in youths with ADHD relative to typically developing youths  
134 (16,19). Other studies have shown that brain volume differences between ADHD and controls  
135 are more dispersed over the brain than previously hypothesized. For example, several studies  
136 have reported volumetric reductions in the temporal lobe and cingulate cortex in youths with  
137 ADHD relative to controls (15,20,24,25).

138         Whereas prior studies investigated genetic and brain volume associations with ADHD as  
139 separate mechanisms, Alemany and colleagues (26) examined whether brain volume might  
140 *mediate* genetic associations (via PGS) of several psychiatric disorders, including schizophrenia,  
141 depression, bipolar disorder, ADHD and autism spectrum disorder. This study tested the  
142 association between PGS on five psychiatric disorders and volumes of several brain regions of  
143 interest (i.e., amygdala-hippocampus complex, caudate, putamen, thalamus, cerebellum, total  
144 brain, ventricles, cortical and subcortical gray matter, and total white matter) in a large,  
145 population-based sample of 9-11-year-old children ( $n=1,139$ ). ADHD PGS was specifically  
146 associated with smaller caudate volume but not the other regions, and the association between  
147 ADHD PGS and male-specific attention problems was mediated by caudate volume, in line with  
148 the well-replicated association between caudate and ADHD. Their findings provide compelling  
149 (albeit, preliminary) evidence that ADHD PGS may reflect specific biological mechanisms in the  
150 development of ADHD.

151         However, one critical limitation of the prior study (26) is that development was not  
152 accounted for. ADHD symptom presentations vary depending on the age of the individual  
153 (27,28). For instance, whereas inattention (IA) symptoms tend to be relatively stable throughout



154 development, hyperactivity/impulsivity (HI) symptoms tend to decline by adulthood (27,29).  
155 Thus, brain-based differences between ADHD and control samples may be age-dependent. In a  
156 mega-analysis of 23 cohorts of ADHD cases and cohorts ( $n=3,200$ ), the researchers found that  
157 volumetric differences between ADHD cases and controls were larger among children (aged  
158 between 4-14) than among adolescents (aged between 15-21) or among adults (aged 22-63) (30).  
159 Specifically, they found that accumbens, amygdala, caudate, hippocampus, putamen, and total  
160 intracranial volumes were smaller in ADHD children than controls, whereas only the  
161 hippocampus was significantly smaller in ADHD cases in adolescents; no brain volume  
162 differences were found in ADHD adults compared to controls. Another study compared whole  
163 brain volumes and subcortical regional volumes between ADHD cases and controls in a Dutch  
164 sample of youths and adults ( $n=672$ ). They reported a reversal in the direction of difference  
165 between cases and controls among young adolescents (aged 8-15), older adolescents (aged 16-22)  
166 and young adults (aged 22-30), such that caudate and putamen volumes were smaller in ADHD  
167 cases than controls among young adolescents, but larger in ADHD cases among young adults  
168 (31). The more restricted and younger age range of the adult sample in the latter study (31) likely  
169 contributed to the inconsistent findings compared to the first study (30). In light of these  
170 inconsistent findings, developmental considerations must be taken into account in genetically-  
171 informed studies of neural mechanisms underlying ADHD.

172         This study focused on children (aged 8-11), adolescents (aged 12-17), and young adults  
173 (aged 18-21) from the Philadelphia Neurodevelopmental Cohort (PNC). Although ADHD PGS  
174 are frequently examined in clinical samples, they are also predictive of psychiatric traits in  
175 population samples as well, as demonstrated in the meta-analysis of ADHD PGS across several  
176 studies (3). Examining PGS in population-based cohorts like PNC can critically extend our

177 knowledge about the neurogenetic basis of ADHD in a normative sample. We specifically  
178 examined whether brain volumes of regions of interests (i.e., caudate, cingulate gyrus, angular  
179 gyrus, DLPFC, and inferior temporal lobe) will mediate the association between PGS and  
180 ADHD. PGS was computed in two ways, the first as a “traditional” PGS (11) and the second that  
181 leverages functional annotations of GWAS via *AnnoPred* (12). First, we hypothesized that both  
182 the traditional and *AnnoPred* PGS will associate with ADHD outcomes (i.e., HI and IA  
183 symptoms) across age groups. Second, and based on previously reported age-related brain  
184 volume differences between ADHD cases and controls across age groups, we hypothesized that  
185 all five brain regions will specifically mediate the path between *AnnoPred* ADHD PGS (i.e., a  
186 more biologically sensitive measure of polygenic liability over traditional ADHD PGS) and  
187 ADHD outcomes in children and adolescents, but not in adults. We made no hypothesis  
188 regarding potential differences in the indirect effects for ADHD IA and HI symptoms given that  
189 there have been no strong lines of evidence suggesting differential ADHD PGS associations by  
190 ADHD presentation type.

## 191 Method

### 192 *Participants*

193 The Philadelphia Neurodevelopmental Cohort (PNC) is a population-based cohort of  
194 children, adolescents, and young adults with data collected on psychiatric disorders, medical  
195 history, neuroimaging, genetics, and neurocognition. Participants were recruited in the greater  
196 Philadelphia, Pennsylvania area between November 2009 to December 2011 (32). Psychiatric  
197 disorders were assessed using a semi-structured, computerized clinical interview adapted from  
198 the Kiddie Schedule for Affective Disorders and Schizophrenia (K-SADS). The interview was  
199 administered to the caregivers or legal guardians (i.e., collaterals) for participants aged 8 to 10

200 (i.e., children; analytic  $n=137$ ), to participants and collaterals for participants aged 11 to 17 (i.e.,  
201 adolescent; analytic  $n=297$ ), and the participants themselves if they were between the ages of 18  
202 to 21 (i.e., young adults; analytic  $n=121$ ). To somewhat account for the fact that different age  
203 groups utilized different raters, we used data from collaterals for participants between 8 to 17  
204 years of age, and from self-report for those older than 18. For additional details on phenotyping  
205 and coding, please refer to He and Li (33). Unfortunately, due to known population stratification  
206 effects in ad-mixed samples and the fact that PGS are highly (and problematically)  
207 underpowered to predict outcomes in non-European ancestry populations (34,35), we focused the  
208 current analyses on PNC individuals who self-reported as European ancestry with genotype,  
209 phenotypic and neuroimaging data (after quality control) (full analytic  $N=555$ ).

#### 210 *Brain imaging and data processing*

211       Neuroimaging details for the PNC sample are provided in Satherwaite et al. (32), and are  
212 briefly summarized here. Data were acquired from a 3T Siemens TIM Trio scanner at the  
213 University of Pennsylvania. The structural images used for this study were obtained via a  
214 magnetization-prepared 180 degrees radio-frequency pulses and rapid gradient-echo (MPRAGE)  
215 sampling sequence (TR = 1810 ms, TE = 3.5 ms, 160 1 mm slices).

216       Freesurfer (v. 7.1.1) (36) was used to automatically parcellate and segment the five  
217 regions of interest (ROIs) used in the study (caudate, cingulate gyrus, angular gyrus, dorsolateral  
218 prefrontal cortex, and inferior temporal lobe). These regions were pre-selected based on previous  
219 evidence of enrichment for ADHD genetic associations (3,7). The command *recon\_all*, with all  
220 default parameters taken, was used with processing steps briefly summarized here; the  
221 processing stream performs the following sequential steps: skull stripping, volumetric labeling,  
222 intensity normalization, white matter segmentation, surface atlas registration, surface extraction,

223 and gyral labeling. The *Destrieux* atlas (37) was used to extract gray matter volume estimates  
224 from ROIs by hemisphere. Bilateral ROI volumes were used as the mediators, per empirical  
225 precedent (38).

#### 226 *ADHD Symptoms*

227 IA and HI ADHD symptoms were assessed from six and three items administered on the  
228 adapted K-SADS, respectively. Example items included: “Did you often have trouble paying  
229 attention or keeping your mind on your school, work, chores, or other activities that you were  
230 doing?”, “Did you often have trouble making plans, doing things that had to be done in a certain  
231 kind of order, or that had a lot of different steps?” and “Did you often blurt out answers to other  
232 people's questions before they finished speaking or interrupt people abruptly?” Symptom counts  
233 of the two ADHD dimensions were computed by summing the number of endorsed items for  
234 each dimension.

#### 235 *Genotyping and Polygenic scores*

236 *Genotyping in PNC.* All participants were genotyped upon consent using common SNP  
237 arrays including Affymetrix Affy60 and Axiom, and Illumina HumanHap550 (v1, v3),  
238 Human610-Quad (v1), and HumanOmniExpress. We conducted standard quality control and  
239 imputation, excluding SNPs with call rate <95%, minor allele frequency <5%, Hardy-Weinberg  
240 equilibrium  $p < 1 * 10^{-4}$  (32,39).

241 *Discovery GWAS.* We used the most recent ADHD GWAS, a case-control meta-analysis  
242 that consisted of 55,374 children and adults (20,183 cases and 35,191 controls) from 12 studies  
243 of mixed (but predominantly European) ancestries (7). The largest cohort among these 12 studies  
244 is a population-based case-control cohort in Denmark (iPSYCH; 14,584 cases and 22,492  
245 controls). The other 11 case-control or trio samples were collected in Europe, Canada, United

246 States and China, and aggregated by the Psychiatric Genomic Consortium (PGC). ADHD case  
247 status was determined based on International Classification of Diseases, tenth revision (ICD-10)  
248 in iPSYCH, and semi-structured clinical interviews (e.g., Schedule for Affective Disorders and  
249 Schizophrenia for School-Age Children, K-SADS) in the other 11 cohorts.

250 *Traditional PGS.* To construct the traditional PGS, we used PLINK (40) to clump the  
251 ADHD GWAS summary statistic and used the European ancestry samples in 1000 Genomes  
252 Project Phase III cohort (41) as the linkage disequilibrium (LD) reference panel. We then  
253 specified an LD window size of 1000 kb and a  $r^2$  threshold of 0.1 for clumping. Finally, we  
254 generated PGS in the PNC target sample in *PRSice-2* (42) and specified a  $p$ -value threshold of 1  
255 to include all SNPs.

256 *AnnoPred PGS.* We constructed annotation-informed PGS for ADHD using *AnnoPred*  
257 (12), a Bayesian framework that leverages genomic annotation information to improve polygenic  
258 risk prediction. This approach improves SNP effect size estimation by integrating publicly  
259 available ADHD GWAS (7) and ADHD heritability enrichment in various functional annotation  
260 categories estimated using LD score regression (LDSC) (43). We incorporated 53 baseline  
261 annotations in LDSC (43), GenoCanyon annotation quantifying the overall genomic  
262 functionality (44), and 66 GenoSkylinePlus cell-type specific annotations (45) to improve the  
263 ADHD *AnnoPred* score. We used 1000 Genomes Project European samples (41) as the LD  
264 reference and the infinitesimal prior in *AnnoPred* to produce SNP posterior mean effects.

## 265 *Analyses*

266 We fit parallel multiple mediation models that included the five brain systems as  
267 mediators, ADHD PGS (traditional and *AnnoPred*) as predictors, and ADHD IA and HI  
268 symptoms as outcomes. Parallel multiple mediation models were conducted to account for

269 expected correlations among volumes of the five brain regions. Given the number of models and  
270 tests conducted,  $p$ -values were FDR-adjusted using the Benjamin-Hochberg method (46). In age-  
271 stratified analyses, we divided the sample by age groups (8-11-year-olds were “children”, 12-17-  
272 year-olds were “adolescents”, and 18-21-year-olds were “young adults”) to test age-specific  
273 effects of PGS and indirect effects. Good model fit was defined as Comparative Fit Index ( $>.95$ )  
274 and Root Mean Square Error of Approximation ( $<.06$ ) (47). Analyses were conducted in R 4.1.2  
275 using the following packages: *semTools*, *lavaan*, *psych*, *stats*. Age, biological sex, standardized  
276 total intracranial volume and the first 10 genetic principal components (to account for population  
277 stratification) were included as covariates in all models.

## 278 Results

### 279 *Descriptive Statistics*

280 The average age of the PNC sample was 14.36 ( $sd=3.39$ ), with 272 (49.10%) being  
281 female. When stratified by age groups (i.e., children, adolescents, and young adults), the average  
282 age was 9.672 ( $sd=1.058$ ), 14.790 ( $sd=1.710$ ) and 18.64 ( $sd=0.837$ ), respectively. Furthermore,  
283 46.715% ( $n=64$ ), 46.464% ( $n=138$ ) and 57.851% ( $n=70$ ) were females across these age groups,  
284 respectively. Participants had an average of 2.489 ( $sd=3.080$ ), 2.037 ( $sd=2.883$ ) and 2.380  
285 ( $sd=2.675$ ) ADHD symptoms, respectively. More details of the sample are shown in Table 1,  
286 including standardized (in the full sample) regional brain volumes and total intracranial volume.

### 287 *Traditional ADHD PGS – Full Sample*

288 Multiple mediation models for IA and HI symptoms fit the data well (CFI=.995,  
289 RMSEA=.096 for both models). Total and direct effects were not significant for either HI or IA  
290 symptoms with traditional ADHD PGS as the predictor (Figure 1;  $FDR$ -corrected  $p >.05$ ). No  
291 indirect effects emerged with traditional ADHD PGS on HI or IA symptoms via the angular

292 gyrus, caudate, cingulate gyrus, DLPFC, and inferior temporal lobe. Traditional ADHD PGS was  
293 associated with DLPFC ( $b=-.084$ ,  $se=.028$ ,  $FDR$ -corrected  $p=.006$ ), but not with the other four  
294 brain regions. In addition, the paths from cingulate gyrus (but not the other brain regions) to HI  
295 and IA symptoms were significant ( $b=.179$ ,  $se=.064$ ,  $FDR$ -corrected  $p=.010$ ;  $b=.295$ ,  $se=.144$ ,  
296  $FDR$ -corrected  $p=.041$ ).

#### 297 *Traditional ADHD PGS – Age-Stratified Models*

298 The same models were tested separately in each of the three age groups to investigate the  
299 possibility of developmental differences of traditional ADHD PGS and their effects through  
300 regional brain volumes on IA and HI symptoms. In children ( $n=137$ ), the models fit well for IA  
301 and HI symptoms ( $CFI=.999$ ,  $RMSEA=.042$  for both models). No total, direct, or indirect effects  
302 via the five brain regions were detected (Figure 2). Traditional ADHD PGS was not associated  
303 with any of the five regional volumes. However, the angular gyrus volume (but not other brain  
304 regions) was significantly associated with IA symptoms ( $b=-.561$ ,  $se=.232$ ,  $FDR$ -corrected  
305  $p=.032$ ).

306 Similarly, no total, direct, or indirect effects were detected in adolescents ( $n=297$ )  
307 (Figure 2). The models for IA and HI symptoms fit acceptably ( $CFI=.992$ ,  $RMSEA=.118$  for  
308 both models). The path from traditional PGS to DLPFC (but not other regions) was significant  
309 ( $b=-.082$ ,  $se=.037$ ,  $FDR$ -corrected  $p=.050$ ). The cingulate gyrus (but not other brain regions)  
310 was associated with HI and IA symptoms ( $b=.219$ ,  $se=.097$ ,  $FDR$ -corrected  $p=.036$ ;  $b=.514$ ,  
311  $se=.245$ ,  $FDR$ -corrected  $p=.036$ , respectively).

312 No total, direct or indirect, PGS-brain nor brain-ADHD pathways were detected in young  
313 adults (see Figure 2). The models fit well for both IA and HI symptoms ( $CFI=.998$ ,  
314  $RMSEA=.032$  for both models).

315 *AnnoPred ADHD PGS – Full Sample*

316           The models for IA and HI symptoms fit well (CFI=.995, RMSEA=.098 for both models).  
317 There were no total effects, total indirect, or direct effects of *AnnoPred* ADHD PGS on HI or IA  
318 symptoms (Figure 3). However, the path from *AnnoPred* ADHD PGS to the DLPFC (but not  
319 other brain regions) was significant ( $b=-.063$ ,  $se=.029$ , *FDR*-corrected  $p=.030$ ). Additionally, the  
320 paths from the cingulate gyrus (but not other regions) to HI and IA symptoms were both  
321 significant ( $b=.181$ ,  $se=.064$ , *FDR*-corrected  $p=.010$ ;  $b=.301$ ,  $se=.144$ , *FDR*-corrected  $p=.041$ ,  
322 respectively).

323 *AnnoPred ADHD PGS – Age-Stratified Models*

324           In children, the models fit well for IA and HI symptoms (CFI=.998, RMSEA=.051 for  
325 both models). No total or direct effects of *AnnoPred* ADHD PGS on HI and IA symptoms or  
326 indirect effects via the five brain regions were detected (Figure 4). *AnnoPred* ADHD PGS was  
327 not associated with any of the five brain regions. The angular gyrus (but not other brain regions)  
328 volume was associated with IA symptoms ( $b=-.594$ ,  $se=.233$ , *FDR*-corrected  $p=.032$ ). No  
329 regional volume was associated with HI symptoms.

330           In adolescents, the models fit acceptably for IA and HI symptoms (CFI=.992,  
331 RMSEA=.118 for both models). There was a direct effect from *AnnoPred* ADHD PGS to IA  
332 symptoms ( $b=.343$ ,  $se=.135$ , *FDR*-corrected  $p=.044$ ), but not for HI symptoms. No total or  
333 indirect effects emerged for IA and HI symptoms via brain volumes (Figure 4). *AnnoPred*  
334 ADHD PGS was not associated with any of the five regional volumes. However, the paths from  
335 cingulate gyrus to HI symptoms and IA symptoms were significant ( $b=.220$ ,  $se=.097$ , *FDR*-  
336 corrected  $p=.036$ ;  $b=.519$ ,  $se=.243$ , *FDR*-corrected  $p=.036$ ).



337 Finally, in young adults, the models fit well for IA and HI symptoms (CFI=.999,  
338 RMSEA=.032 for both models). No total, direct, or indirect effects emerged for PGS-brain or  
339 brain-ADHD pathways to either IA or HI symptoms (Figure 4).

#### 340 Discussion

341 The primary objective of this study was to investigate whether the effects of ADHD PGS,  
342 computed both traditionally and annotated functionally, were mediated by volumes of five brain  
343 regions – the caudate, cingulate gyrus, angular gyrus, DLPFC, and inferior temporal lobe – in a  
344 population-based dataset of children, adolescents, and young adults. We also examined age-  
345 stratified effects of the potential mediation pathways between PGS and ADHD symptoms. With  
346 respect to our first hypothesis, we found that traditionally computed ADHD PGS was not  
347 associated with either IA or HI symptoms, regardless of age group. However, *AnnoPred* ADHD  
348 PGS associated with IA symptoms, but only in adolescents. With respect to our second  
349 hypothesis, we found no indirect effects between either the traditional or the *AnnoPred* ADHD  
350 PGS via the five brain regions on IA or HI symptoms. No indirect effects between ADHD PGS  
351 and IA and HI symptoms via brain volumes were observed in our full sample analyses as well as  
352 in our age-stratified models.

353 First, we found that the *AnnoPred* ADHD PGS was associated with IA (but not HI)  
354 symptoms for adolescents specifically. Functionally annotated ADHD PGS may be more  
355 developmentally sensitive than traditional ADHD PGS, which have previously been shown to be  
356 less discriminative between various age groups (3,10). One possibility is that there may be  
357 developmentally distinct genetic influences for ADHD that depends on the age and  
358 developmental stage of the individual (1,48–51). This possibility is supported by recent evidence  
359 from another ADHD GWAS, which found distinct genetic architectures underlying childhood

360 ADHD, persistent ADHD, and those with adult-onset ADHD (52). This finding supports the  
361 possibility that the genetic liability for ADHD may be developmentally specific. Developmental  
362 specificity may also help to explain why *AnnoPred* ADHD PGS was associated with IA but not  
363 HI symptoms, given the relative stability of IA symptomology over time in individuals (27).

364 Our findings did not support our second hypothesis regarding indirect effects between  
365 *AnnoPred* ADHD PGS and IA and HI symptoms via brain volumes. The lack of significant PGS-  
366 brain and brain-ADHD pathways could be due to the non-clinical nature of PNC, which featured  
367 a relatively low prevalence of ADHD diagnoses and symptomology. It is possible that the  
368 relatively low levels of variability in ADHD symptomology, even for a population-based sample  
369 like PNC, may have limited the power to detect effects via ADHD PGS. In addition, most  
370 structural MRI studies in ADHD and the ADHD GWAS were conducted in case-control samples  
371 of youths or adults (53). The brain regions we focused on in our study were informed by these  
372 ADHD case-control studies, which may not have been generalizable to large population-based  
373 studies (54). Future studies should examine the possibility that neurogenetic mechanisms of  
374 ADHD may differ between clinical and the general population samples (55).

375 However, we did detect a negative association between ADHD PGS (both traditional and  
376 *AnnoPred*) and DLPFC volumes in our study. Although the DLPFC was not associated with  
377 ADHD symptoms in our study (perhaps due to the limited variability in ADHD symptoms), prior  
378 studies have found that the DLPFC was the most enriched region with respect to ADHD-  
379 associated genetic variants relative to the other brain regions we tested (7,19). In our age-  
380 stratified analyses, we also observed a negative association between ADHD PGS and DLPFC in  
381 adolescents specifically, which might be attributable to an increased heritability of DLPFC  
382 volume from childhood to adolescence (56,57). Given that our study was cross-sectional, future

383 studies should explore changes in the heritability of brain measures in relation to the  
384 development of ADHD.

385         We also found several brain volume-ADHD associations that were somewhat  
386 inconsistent with the prior neuroimaging literature. We found that *increased* cingulate gyrus  
387 volume was associated with greater HI and IA symptoms in the full sample and in adolescents  
388 specifically. This was inconsistent from prior literature which found *reduced* volumes in the  
389 cingulate cortex in youths and adults with ADHD relative to controls (15,53,58). The cingulate  
390 gyrus is part of the cingulate cortex that is known for its role in controlled cognition, response  
391 inhibition, novelty detection and motivation (58). We posit two possible explanations for our  
392 findings. First, these previous studies regressed volumes of each region of interests separately on  
393 ADHD status, along with a set of covariates (e.g., biological sex, age, total intracranial volume).  
394 Our study examined the cingulate simultaneously with several other brain regions within a  
395 multiple mediator framework (in addition to accounting for standard covariates), thereby  
396 accounting for the high degree of covariation between these brain regions. Additionally, these  
397 previous studies were conducted in exclusively clinical (or case-control) samples. The cingulate  
398 cortex (along with other previously implicated brain regions for ADHD) may associate with  
399 natural variations in ADHD symptoms differently in population-based samples that feature lesser  
400 severity and greater heterogeneity of symptomologies.

401         Several limitations in our study should be noted. First, our measure of ADHD in young  
402 adults was based on retrospective self-report, whereas ADHD in children and adolescents was  
403 based on parent-report. Reporter bias and discrepancies (59) may have affected the  
404 generalizability/comparability of our findings between children/adolescents and young adults in  
405 our study. Relatedly, self-reported measures of ADHD could be related to lower heritability

406 estimates relative to ADHD reported by other informants (60). Hence, it is possible that the lack  
407 of an ADHD PGS direct effect in young adults may be due to this phenomenon. Second,  
408 medication status of the sample was unknown, thus preventing us from testing whether our  
409 findings are robust against the effect of medication on both ADHD symptoms and on cortical  
410 maturation. Third, ADHD HI symptoms were measured by only three items, thus limiting the  
411 variability of HI symptoms in the sample. It is possible that the relative lack of variance in HI  
412 symptoms can partially explain the developmental specificity of *AnnoPred* PGS and IA  
413 symptoms in adolescents, but not HI symptoms. Fourth, we used cortical and subcortical  
414 volumes in our study, in line with empirical precedents (38). However, other brain structural  
415 measures (e.g., cortical thickness, surface area, fractional anisotropy) as well as functional  
416 measures (e.g., regional and network activation) have been studied in relation to ADHD but were  
417 not tested in the current study (15,53,54,61). Future studies may consider incorporating other  
418 brain measures to test genetic mechanisms of ADHD. Finally, PNC is a cross-sectional study,  
419 which precluded our ability to examine whether (or how) PGS affect both brain structures and  
420 ADHD symptomology over time (e.g., via longitudinal modeling).

421         To conclude, we found a developmentally-specific direct effect of novel *AnnoPred*  
422 ADHD PGS on IA symptoms in a population-based sample. Our biologically-informed PGS  
423 yielded a more powerful and developmentally-specific signal in detecting this direct effect  
424 relative to the traditional (i.e., statistically-driven) approach to PGS. However, no indirect effects  
425 between ADHD PGS (measured traditionally and *AnnoPred*) and ADHD symptomology via  
426 brain regions emerged in our analysis. Of note, although ADHD PGS are robust predictors of  
427 ADHD, they only explain about 4% of the variance in ADHD, and even less variance in  
428 population-based cohorts (3). As GWAS sample sizes continue to climb, ADHD PGS will

429 become more predictive over time. There will be a need for more studies that integrate both  
430 genetic and neuroimaging information to advance our understanding of the biological  
431 mechanisms underlying ADHD.

432 **Abbreviations:** ADHD: attention deficit hyperactivity disorder; CFI: Comparative Fit Index;  
433 DLPFC: dorsolateral prefrontal cortex; GWAS: genome-wide association study; HI:  
434 hyperactivity-impulsivity; IA: inattention; PGS: polygenic score; RMSEA: Root Mean Square  
435 Error of Approximation

436

437

438

439

440

441

442

443

444

445

446

## References

- 447 1. Moffitt TE, Houts R, Asherson P, Belsky DW, Corcoran DL, Hammerle M, et al. Is Adult  
448 ADHD a Childhood-Onset Neurodevelopmental Disorder? Evidence From a Four-Decade  
449 Longitudinal Cohort Study. *AJP*. 2015 Oct;172(10):967–77.
- 450 2. Polanczyk GV, Salum GA, Sugaya LS, Caye A, Rohde LA. Annual Research Review: A  
451 meta-analysis of the worldwide prevalence of mental disorders in children and adolescents.  
452 *Journal of Child Psychology and Psychiatry*. 2015;56(3):345–65.
- 453 3. Li JJ, He Q. Polygenic Scores for ADHD: A Meta-Analysis. *Res Child Adolesc*  
454 *Psychopathol* [Internet]. 2021 Jan 25 [cited 2021 Jan 25]; Available from:  
455 <https://doi.org/10.1007/s10802-021-00774-4>
- 456 4. Demontis D, Walters RK, Rajagopal VM, Waldman ID, Grove J, Als TD, et al. Risk variants  
457 and polygenic architecture of disruptive behavior disorders in the context of attention-  
458 deficit/hyperactivity disorder. *Nature Communications*. 2021 Jan 25;12(1):576.
- 459 5. Faraone SV, Larsson H. Genetics of attention deficit hyperactivity disorder. *Molecular*  
460 *Psychiatry*. 2018 Jun 11;1.
- 461 6. Tost H, Bilek E, Meyer-Lindenberg A. Brain connectivity in psychiatric imaging genetics.  
462 *NeuroImage*. 2012 Oct 1;62(4):2250–60.
- 463 7. Demontis D, Walters RK, Martin J, Mattheisen M, Als TD, Agerbo E, et al. Discovery of the  
464 first genome-wide significant risk loci for attention deficit/hyperactivity disorder. *Nat Genet*.  
465 2019 Jan;51(1):63–75.
- 466 8. Demontis D, Walters GB, Athanasiadis G, Walters R, Therrien K, Farajzadeh L, et al.  
467 Genome-wide analyses of ADHD identify 27 risk loci, refine the genetic architecture and  
468 implicate several cognitive domains [Internet]. *medRxiv*; 2022 [cited 2022 Jun 22]. p.  
469 2022.02.14.22270780. Available from:  
470 <https://www.medrxiv.org/content/10.1101/2022.02.14.22270780v1>
- 471 9. Plomin R, Haworth CMA, Davis OSP. Common disorders are quantitative traits. *Nature*  
472 *Reviews Genetics*. 2009 Dec;10(12):872–8.
- 473 10. Ronald A, de Bode N, Polderman TJC. Systematic Review: How the Attention-  
474 Deficit/Hyperactivity Disorder Polygenic Risk Score Adds to Our Understanding of ADHD  
475 and Associated Traits. *Journal of the American Academy of Child & Adolescent Psychiatry*.  
476 2021 Oct 1;60(10):1234–77.
- 477 11. Purcell SM, Wray NR, Stone JL, Visscher PM, O'Donovan MC, Sullivan PF, et al. Common  
478 polygenic variation contributes to risk of schizophrenia and bipolar disorder. *Nature*. 2009  
479 Aug 6;460(7256):748–52.

- 480 12. Hu Y, Lu Q, Powles R, Yao X, Yang C, Fang F, et al. Leveraging functional annotations in  
481 genetic risk prediction for human complex diseases. *PLOS Computational Biology*. 2017 Jun  
482 8;13(6):e1005589.
- 483 13. Meyer-Lindenberg A, Weinberger DR. Intermediate phenotypes and genetic mechanisms of  
484 psychiatric disorders. *Nature Reviews Neuroscience*. 2006 Oct 1;7(10):818–28.
- 485 14. Castellanos FX, Lee PP, Sharp W, Jeffries NO, Greenstein DK, Clasen LS, et al.  
486 Developmental Trajectories of Brain Volume Abnormalities in Children and Adolescents  
487 With Attention-Deficit/Hyperactivity Disorder. *JAMA*. 2002 Oct 9;288(14):1740–8.
- 488 15. Kobel M, Bechtel N, Specht K, Klarhöfer M, Weber P, Scheffler K, et al. Structural and  
489 functional imaging approaches in attention deficit/hyperactivity disorder: Does the temporal  
490 lobe play a key role? *Psychiatry Research: Neuroimaging*. 2010 Sep 30;183(3):230–6.
- 491 16. Krain AL, Castellanos FX. Brain development and ADHD. *Clinical Psychology Review*.  
492 2006 Aug 1;26(4):433–44.
- 493 17. Sowell ER, Thompson PM, Welcome SE, Henkenius AL, Toga AW, Peterson BS. Cortical  
494 abnormalities in children and adolescents with attention-deficit hyperactivity disorder. *The  
495 Lancet*. 2003 Nov 22;362(9397):1699–707.
- 496 18. Frodl T, Skokauskas N. Meta-analysis of structural MRI studies in children and adults with  
497 attention deficit hyperactivity disorder indicates treatment effects. *Acta Psychiatrica  
498 Scandinavica*. 2012 Feb;125(2):114–26.
- 499 19. Kasperek T, Theiner P, Filova A. Neurobiology of ADHD From Childhood to Adulthood:  
500 Findings of Imaging Methods. *J Atten Disord*. 2015 Nov 1;19(11):931–43.
- 501 20. Seidman LJ, Valera EM, Makris N, Monuteaux MC, Boriel DL, Kelkar K, et al. Dorsolateral  
502 Prefrontal and Anterior Cingulate Cortex Volumetric Abnormalities in Adults with  
503 Attention-Deficit/Hyperactivity Disorder Identified by Magnetic Resonance Imaging.  
504 *Biological Psychiatry*. 2006 Nov 15;60(10):1071–80.
- 505 21. Vilgis V, Sun L, Chen J, Silk TJ, Vance A. Global and local grey matter reductions in boys  
506 with ADHD combined type and ADHD inattentive type. *Psychiatry Research: Neuroimaging*.  
507 2016 Aug 30;254:119–26.
- 508 22. Grahn JA, Parkinson JA, Owen AM. The cognitive functions of the caudate nucleus.  
509 *Progress in Neurobiology*. 2008 Nov 1;86(3):141–55.
- 510 23. Hertrich I, Dietrich S, Blum C, Ackermann H. The Role of the Dorsolateral Prefrontal  
511 Cortex for Speech and Language Processing. *Frontiers in Human Neuroscience* [Internet].  
512 2021 [cited 2022 Jul 29];15. Available from:  
513 <https://www.frontiersin.org/articles/10.3389/fnhum.2021.645209>
- 514 24. Buckner RL. The brain's default network: origins and implications for the study of psychosis.  
515 *Dialogues Clin Neurosci*. 2013 Sep;15(3):351–8.

- 516 25. Liddle EB, Hollis C, Batty MJ, Groom MJ, Totman JJ, Liotti M, et al. Task-related default  
517 mode network modulation and inhibitory control in ADHD: effects of motivation and  
518 methylphenidate. *Journal of Child Psychology and Psychiatry*. 2011;52(7):761–71.
- 519 26. Alemany S, Jansen PR, Muetzel RL, Marques N, El Marroun H, Jaddoe VWV, et al.  
520 Common Polygenic Variations for Psychiatric Disorders and Cognition in Relation to Brain  
521 Morphology in the General Pediatric Population. *J Am Acad Child Adolesc Psychiatry*. 2019  
522 Jun;58(6):600–7.
- 523 27. Franke B, Michelini G, Asherson P, Banaschewski T, Billow A, Buitelaar JK, et al. Live fast,  
524 die young? A review on the developmental trajectories of ADHD across the lifespan.  
525 *European Neuropsychopharmacology*. 2018 Oct 1;28(10):1059–88.
- 526 28. Holbrook JR, Cuffe SP, Cai B, Visser SN, Forthofer MS, Bottai M, et al. Persistence of  
527 Parent-Reported ADHD Symptoms From Childhood Through Adolescence in a Community  
528 Sample. *J Atten Disord*. 2016 Jan 1;20(1):11–20.
- 529 29. Pingault JB, Viding E, Galéra C, Greven CU, Zheng Y, Plomin R, et al. Genetic and  
530 Environmental Influences on the Developmental Course of Attention-Deficit/Hyperactivity  
531 Disorder Symptoms From Childhood to Adolescence. *JAMA Psychiatry*. 2015 Jul  
532 1;72(7):651–8.
- 533 30. Hoogman M, Bralten J, Hibar DP, Mennes M, Zwiers MP, Schweren LSJ, et al. Subcortical  
534 brain volume differences in participants with attention deficit hyperactivity disorder in  
535 children and adults: a cross-sectional mega-analysis. *The Lancet Psychiatry*. 2017 Apr  
536 1;4(4):310–9.
- 537 31. Greven CU, Bralten J, Mennes M, O'Dwyer L, van Hulzen KJE, Rommelse N, et al.  
538 Developmentally Stable Whole-Brain Volume Reductions and Developmentally Sensitive  
539 Caudate and Putamen Volume Alterations in Those With Attention-Deficit/Hyperactivity  
540 Disorder and Their Unaffected Siblings. *JAMA Psychiatry*. 2015 May 1;72(5):490–9.
- 541 32. Satterthwaite TD, Connolly JJ, Ruparel K, Calkins ME, Jackson C, Elliott MA, et al. The  
542 Philadelphia Neurodevelopmental Cohort: A Publicly Available Resource for the Study of  
543 Normal and Abnormal Brain Development in Youth. *Neuroimage*. 2016 Jan 1;124(0  
544 0):1115–9.
- 545 33. He Q, Li JJ. Factorial invariance in hierarchical factor models of mental disorders in African  
546 American and European American youths. *J Child Psychol Psychiatry*. 2021 Mar;62(3):289–  
547 98.
- 548 34. Duncan L, Shen H, Gelaye B, Meijsen J, Ressler K, Feldman M, et al. Analysis of polygenic  
549 risk score usage and performance in diverse human populations. *Nat Commun [Internet]*.  
550 2019 Jul 25 [cited 2020 Jul 4];10. Available from:  
551 <https://www.ncbi.nlm.nih.gov/pmc/articles/PMC6658471/>
- 552 35. Martin AR, Kanai M, Kamatani Y, Okada Y, Neale BM, Daly MJ. Clinical use of current  
553 polygenic risk scores may exacerbate health disparities. *Nat Genet*. 2019 Apr;51(4):584–91.



- 554 36. Fischl B. FreeSurfer. *Neuroimage*. 2012 Aug 15;62(2):774–81.
- 555 37. Destrieux C, Fischl B, Dale A, Halgren E. Automatic parcellation of human cortical gyri and  
556 sulci using standard anatomical nomenclature. *Neuroimage*. 2010 Oct 15;53(1):1–15.
- 557 38. Das D, Cherbuin N, Anstey KJ, Abhayaratna W, Easteal S. Regional Brain Volumes and  
558 ADHD Symptoms in Middle-Aged Adults: The PATH Through Life Study. *J Atten Disord*.  
559 2017 Nov 1;21(13):1073–86.
- 560 39. Bi X, Yang L, Li T, Wang B, Zhu H, Zhang H. Genome-wide mediation analysis of  
561 psychiatric and cognitive traits through imaging phenotypes. *Human Brain Mapping*.  
562 2017;38(8):4088–97.
- 563 40. Purcell S, Neale B, Todd-Brown K, Thomas L, Ferreira MAR, Bender D, et al. PLINK: A  
564 Tool Set for Whole-Genome Association and Population-Based Linkage Analyses. *The*  
565 *American Journal of Human Genetics*. 2007 Sep 1;81(3):559–75.
- 566 41. Auton A, Abecasis GR, Altshuler DM, Durbin RM, Abecasis GR, Bentley DR, et al. A  
567 global reference for human genetic variation. *Nature*. 2015 Oct;526(7571):68–74.
- 568 42. Choi SW, O'Reilly PF. PRSice-2: Polygenic Risk Score software for biobank-scale data.  
569 *Gigascience* [Internet]. 2019 Jul 1 [cited 2019 Oct 29];8(7). Available from:  
570 <https://academic.oup.com/gigascience/article/8/7/giz082/5532407>
- 571 43. Finucane HK, Bulik-Sullivan B, Gusev A, Trynka G, Reshef Y, Loh PR, et al. Partitioning  
572 heritability by functional annotation using genome-wide association summary statistics. *Nat*  
573 *Genet*. 2015 Nov;47(11):1228–35.
- 574 44. Lu Q, Hu Y, Sun J, Cheng Y, Cheung KH, Zhao H. A Statistical Framework to Predict  
575 Functional Non-Coding Regions in the Human Genome Through Integrated Analysis of  
576 Annotation Data. *Sci Rep*. 2015 May 27;5(1):10576.
- 577 45. Lu Q, Powles RL, Abdallah S, Ou D, Wang Q, Hu Y, et al. Systematic tissue-specific  
578 functional annotation of the human genome highlights immune-related DNA elements for  
579 late-onset Alzheimer's disease. *PLOS Genetics*. 2017 Jul 24;13(7):e1006933.
- 580 46. Benjamini Y, Hochberg Y. Controlling the False Discovery Rate: A Practical and Powerful  
581 Approach to Multiple Testing. *Journal of the Royal Statistical Society Series B*  
582 (Methodological). 1995;57(1):289–300.
- 583 47. Hu L tze, Bentler PM. Cutoff criteria for fit indexes in covariance structure analysis:  
584 Conventional criteria versus new alternatives. *Structural Equation Modeling: A*  
585 *Multidisciplinary Journal*. 1999 Jan 1;6(1):1–55.
- 586 48. Eilertsen EM, Gjerde LC, Kendler KS, Røysamb E, Aggen SH, Gustavson K, et al.  
587 Development of ADHD symptoms in preschool children: Genetic and environmental  
588 contributions. *Development and Psychopathology*. 2019 Oct;31(4):1299–305.

- 589 49. Kendler KS, Gardner CO, Lichtenstein P. A developmental twin study of symptoms of  
590 anxiety and depression: evidence for genetic innovation and attenuation. *Psychological*  
591 *Medicine*. 2008 Nov;38(11):1567–75.
- 592 50. Larsson JO, Larsson H, Lichtenstein P. Genetic and Environmental Contributions to Stability  
593 and Change of ADHD Symptoms Between 8 and 13 Years of Age: A Longitudinal Twin  
594 Study. *Journal of the American Academy of Child & Adolescent Psychiatry*. 2004  
595 Oct;43(10):1267–75.
- 596 51. Lewis GJ, Plomin R. Heritable influences on behavioural problems from early childhood to  
597 mid-adolescence: evidence for genetic stability and innovation. *Psychol Med*. 2015  
598 Jul;45(10):2171–9.
- 599 52. Rajagopal VM, Duan J, Vilar-Ribó L, Grove J, Zayats T, Ramos-Quiroga JA, et al.  
600 Differences in the genetic architecture of common and rare variants in childhood, persistent  
601 and late-diagnosed attention-deficit hyperactivity disorder. *Nat Genet*. 2022  
602 Aug;54(8):1117–24.
- 603 53. Valera EM, Faraone SV, Murray KE, Seidman LJ. Meta-Analysis of Structural Imaging  
604 Findings in Attention-Deficit/Hyperactivity Disorder. *Biological Psychiatry*. 2007 Jun  
605 15;61(12):1361–9.
- 606 54. Bernanke J, Luna A, Chang L, Bruno E, Dworkin J, Posner J. Structural brain measures  
607 among children with and without ADHD in the Adolescent Brain and Cognitive  
608 Development Study cohort: a cross-sectional US population-based study. *The Lancet*  
609 *Psychiatry*. 2022 Mar;9(3):222–31.
- 610 55. Westreich D. Berkson’s bias, selection bias, and missing data. *Epidemiology*. 2012  
611 Jan;23(1):159–64.
- 612 56. Lenroot RK, Schmitt JE, Ordaz SJ, Wallace GL, Neale MC, Lerch JP, et al. Differences in  
613 genetic and environmental influences on the human cerebral cortex associated with  
614 development during childhood and adolescence. *Hum Brain Mapp*. 2009 Jan;30(1):163–74.
- 615 57. Rommelse N, Buitelaar JK, Hartman CA. Structural brain imaging correlates of ASD and  
616 ADHD across the lifespan: a hypothesis-generating review on developmental ASD–ADHD  
617 subtypes. *J Neural Transm*. 2017 Feb 1;124(2):259–71.
- 618 58. Bush G. Cingulate, Frontal, and Parietal Cortical Dysfunction in Attention-  
619 Deficit/Hyperactivity Disorder. *Biological Psychiatry*. 2011 Jun;69(12):1160–7.
- 620 59. Kooij JJS, Boonstra AM, Swinkels SHN, Bekker EM, de Noord I, Buitelaar JK. Reliability,  
621 validity, and utility of instruments for self-report and informant report concerning symptoms  
622 of ADHD in adult patients. *Journal of Attention Disorders*. 2008;11(4):445–58.
- 623 60. Brikell I, Kuja-Halkola R, Larsson H. Heritability of attention-deficit hyperactivity disorder  
624 in adults. *American Journal of Medical Genetics Part B: Neuropsychiatric Genetics*.  
625 2015;168(6):406–13.

626 61. Boedhoe PSW, van Rooij D, Hoogman M, Twisk JWR, Schmaal L, Abe Y, et al. Subcortical  
627 Brain Volume, Regional Cortical Thickness, and Cortical Surface Area Across Disorders:  
628 Findings From the ENIGMA ADHD, ASD, and OCD Working Groups. *Am J Psychiatry*.  
629 2020 Sep 1;177(9):834–43.

630

Table 1. Descriptive statistics

|                                                          | Full                  | Children              | Adolescents           | Young Adults          |
|----------------------------------------------------------|-----------------------|-----------------------|-----------------------|-----------------------|
| <i>n</i>                                                 | 555                   | 137                   | 297                   | 121                   |
| Age ( <i>sd</i> )                                        | 14.360 (3.394)        | 9.672 (1.058)         | 14.790 (1.710)        | 18.640 (.837)         |
| Biological sex (# female/percentage)                     | 272 (49.100%)         | 64 (46.715%)          | 138 (46.464%)         | 70 (57.851%)          |
| ADHD total symptoms ( <i>sd</i> )                        | 2.223 (2.891)         | 2.489 (3.080)         | 2.037 (2.883)         | 2.380 (2.675)         |
| ADHD inattention symptoms ( <i>sd</i> )                  | 1.634 (2.173)         | 1.759 (2.235)         | 1.562 (2.249)         | 1.669 (1.908)         |
| ADHD hyperactivity/impulsivity symptoms ( <i>sd</i> )    | .589 (.967)           | .729 (1.068)          | .475 (.893)           | .711 (.995)           |
| Brain regions (volume)                                   |                       |                       |                       |                       |
| Angular gyrus, standardized ( <i>sd</i> )                | -.010 (.867)          | .458 (.872)           | -.049 (.803)          | -.044 (.754)          |
| Caudate, standardized ( <i>sd</i> )                      | -.011 (.975)          | .302 (.935)           | -.068 (.987)          | -.227 (.909)          |
| Cingulate gyrus, standardized ( <i>sd</i> )              | -.013 (.988)          | .469 (.874)           | -.044 (.984)          | -.485 (.872)          |
| DLPFC, standardized ( <i>sd</i> )                        | -.015 (.983)          | .547 (.934)           | -.073 (.934)          | -.511 (.906)          |
| Inferior temporal lobe, standardized ( <i>sd</i> )       | -.008 (.996)          | .328 (.890)           | .022 (.947)           | -.460 (1.062)         |
| Total intracranial volume, mm <sup>3</sup> ( <i>sd</i> ) | 1413671<br>(143764.2) | 1417708<br>(114153.5) | 1421687<br>(146137.3) | 1389422<br>(164925.8) |

### A. Full Sample Traditional PGS – ADHD IA symptoms

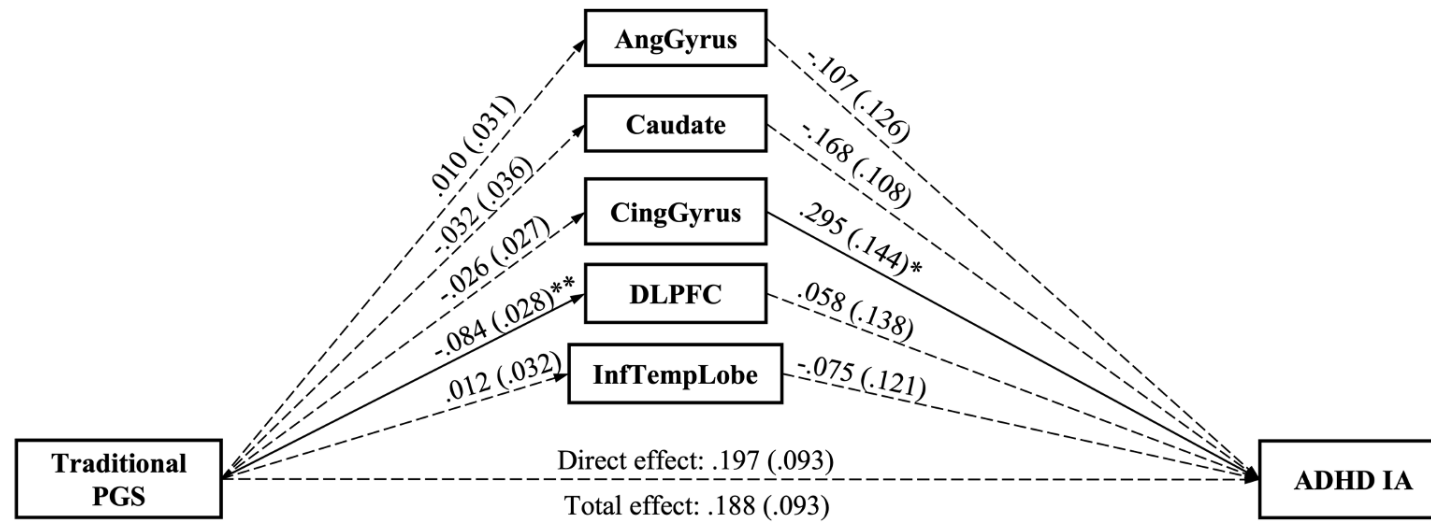

### B. Full Sample Traditional PGS – ADHD HI symptoms

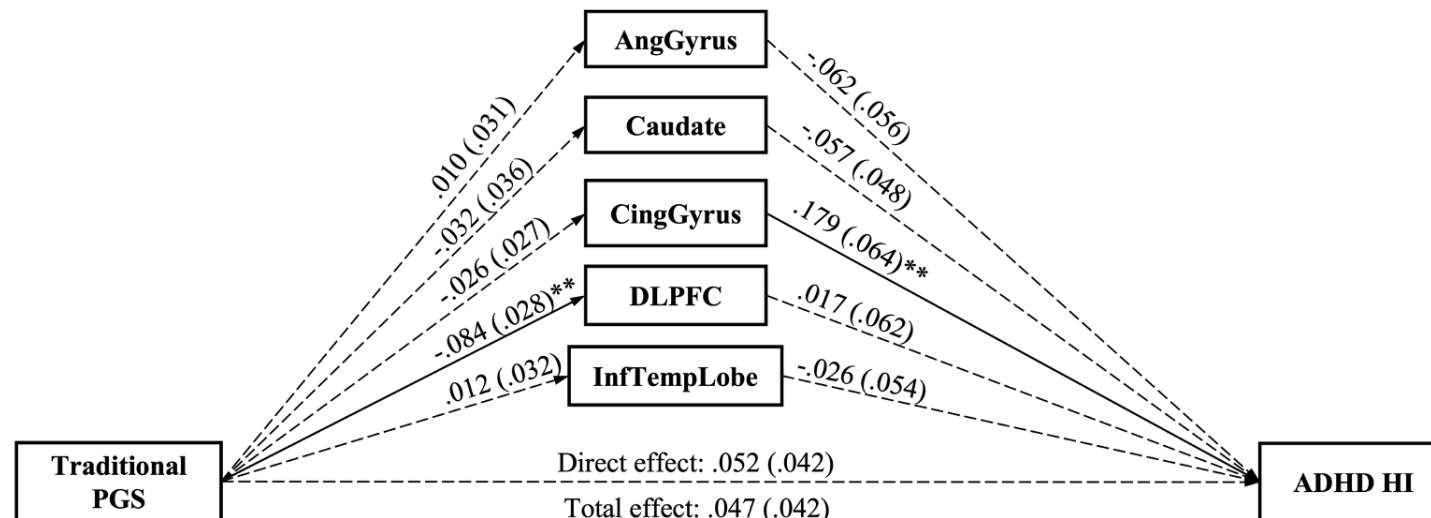

Figure 1. Multiple mediation paths between traditional ADHD PGS and ADHD symptoms via five brain regions in the full sample of youths and young adults in PNC.

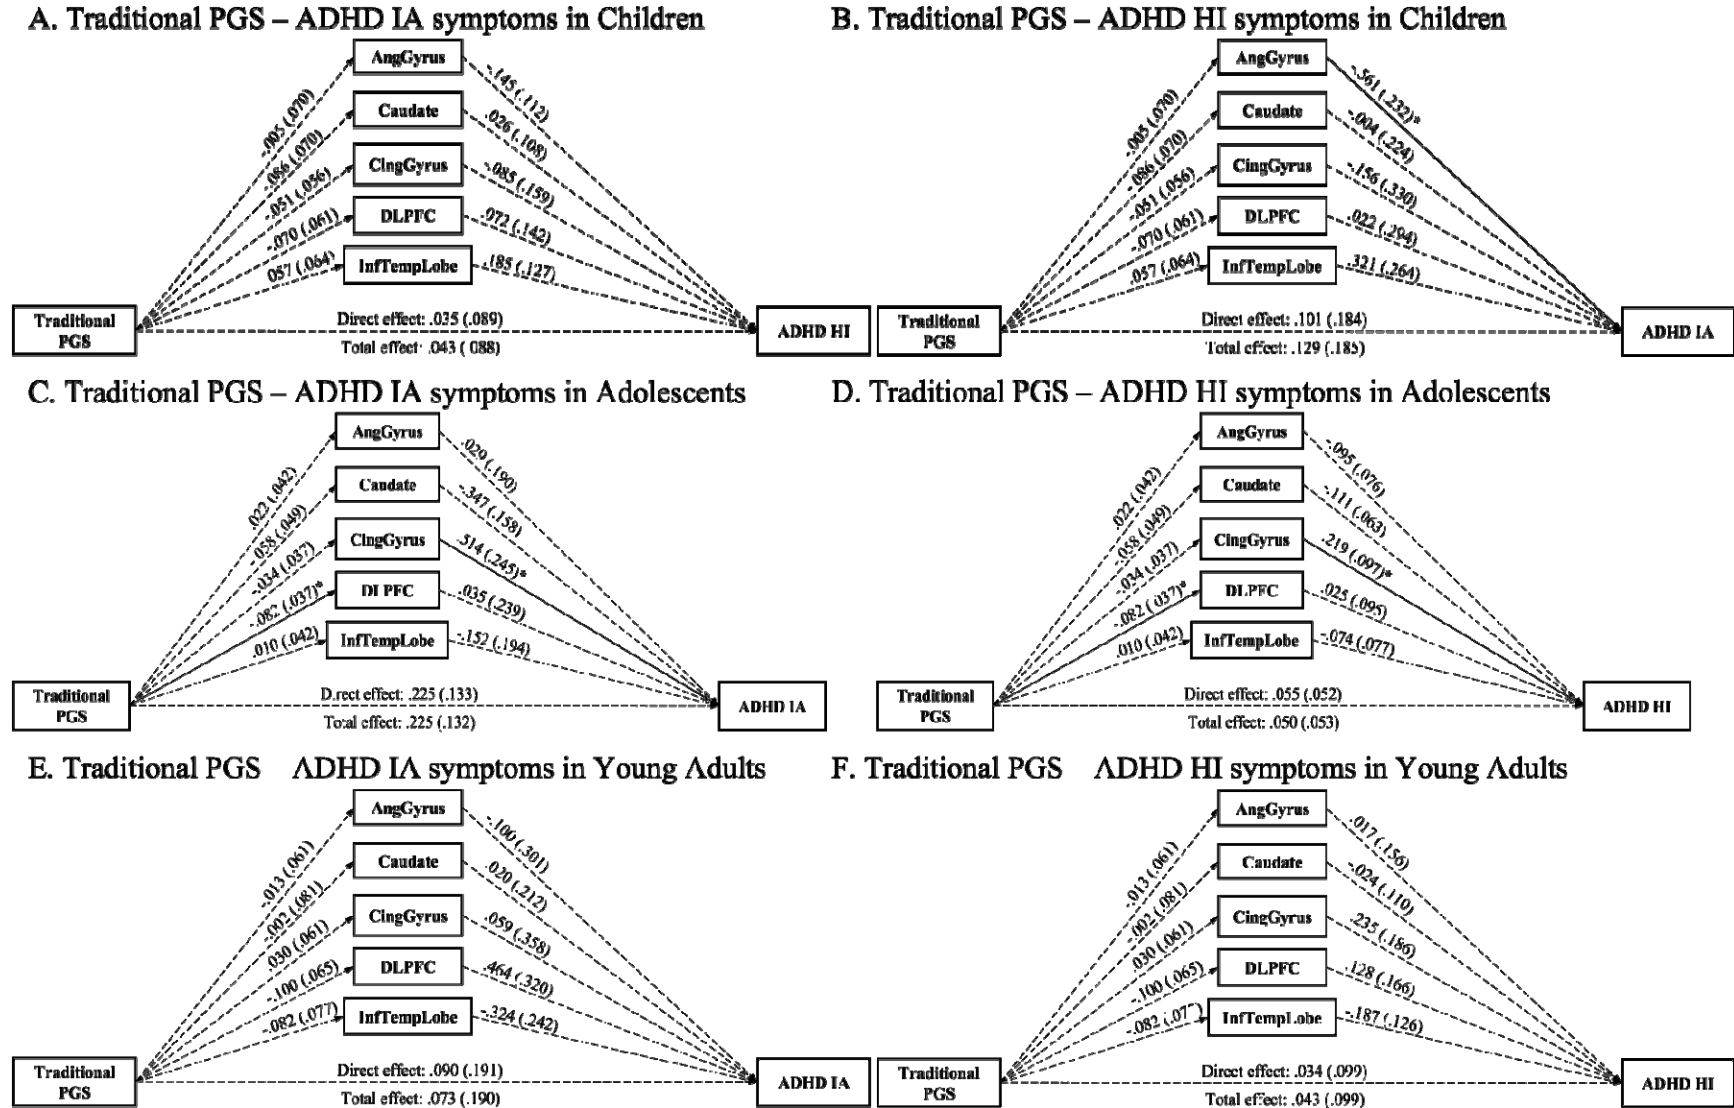

Figure 2. Multiple mediation paths between traditional ADHD PGS and ADHD symptoms via brain regions in children, adolescents, and adults in PNC

**A. Full Sample AnnoPred PGS – ADHD IA symptoms**

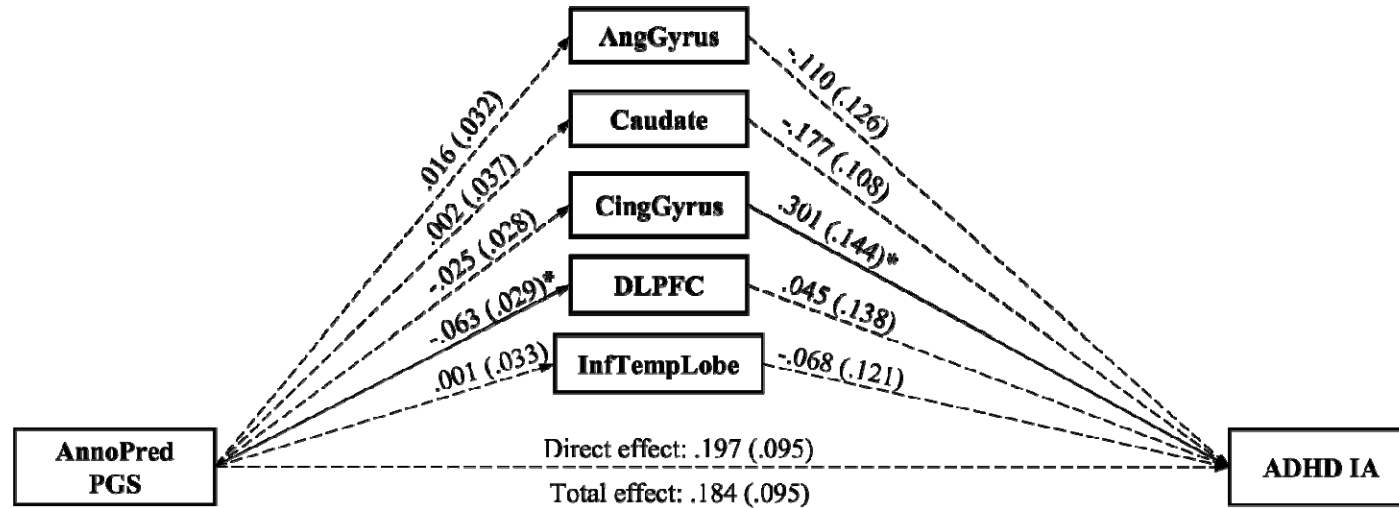

**B. Full Sample AnnoPred PGS – ADHD HI symptoms**

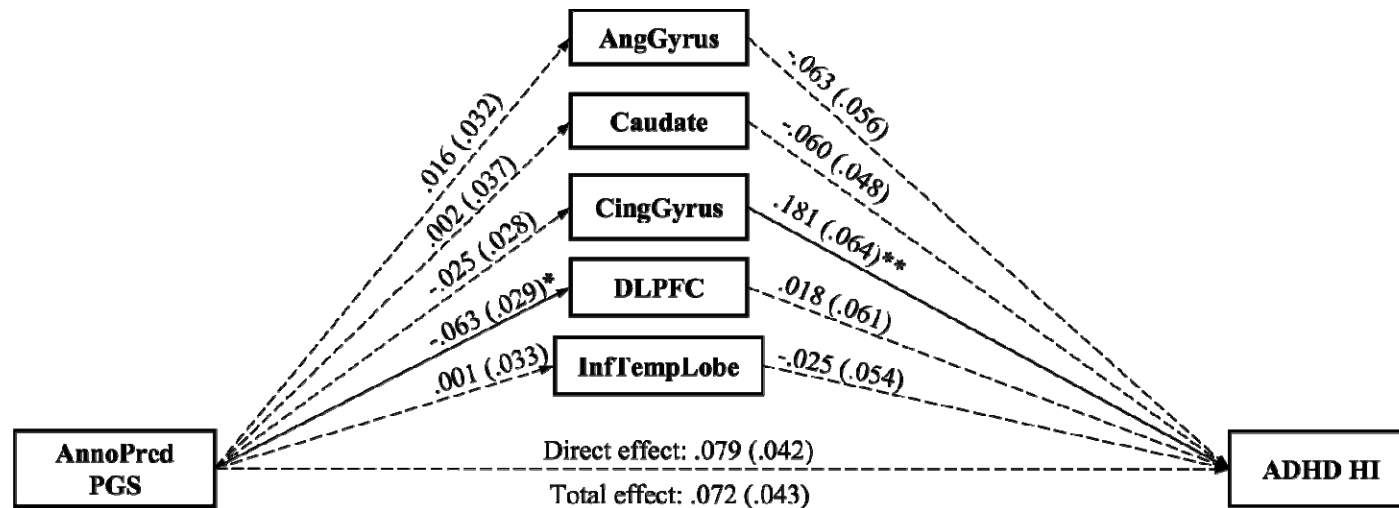

Figure 3. Multiple mediation paths between AnnoPred ADHD PGS and ADHD symptoms via brain regions in the full sample of children, adolescents, and young adults in PNC

A. AnnoPred PGS – ADHD IA symptoms in Children

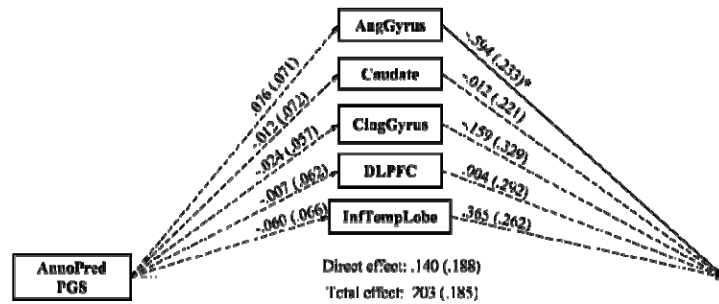

B. AnnoPred PGS – ADHD HI symptoms in Children

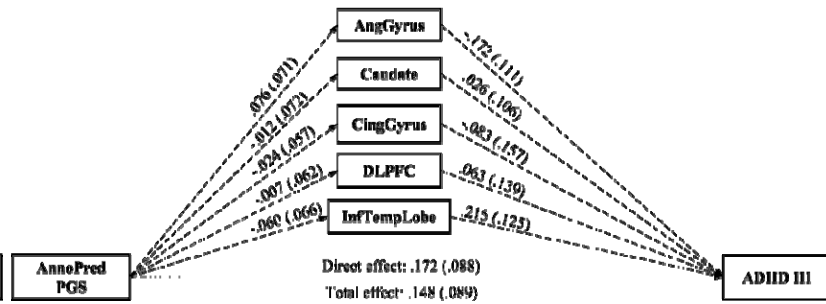

C. AnnoPred PGS – ADHD IA symptoms in Adolescents

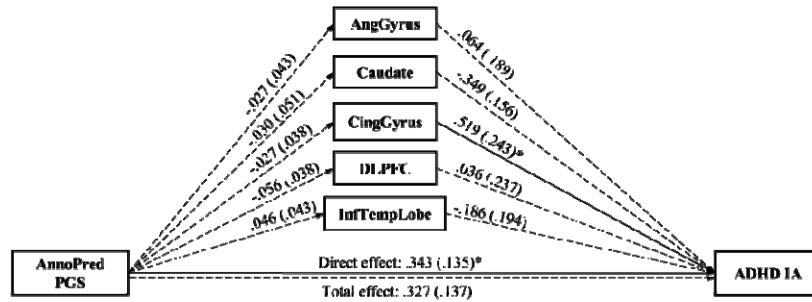

D. AnnoPred PGS – ADHD HI symptoms in Adolescents

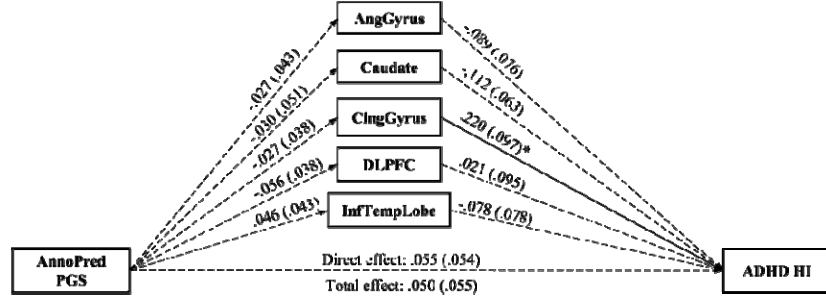

E. AnnoPred PGS – ADHD IA symptoms in Young Adults

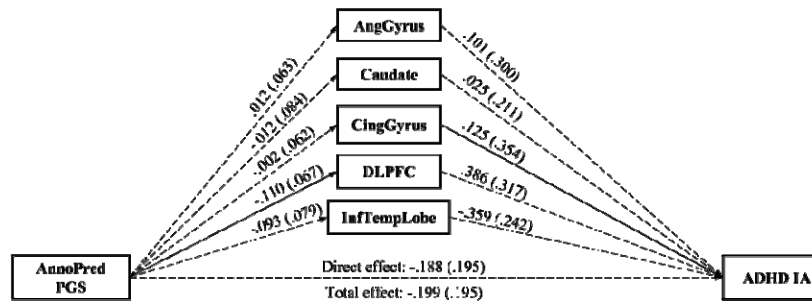

F. AnnoPred PGS – ADHD HI symptoms in Young Adults

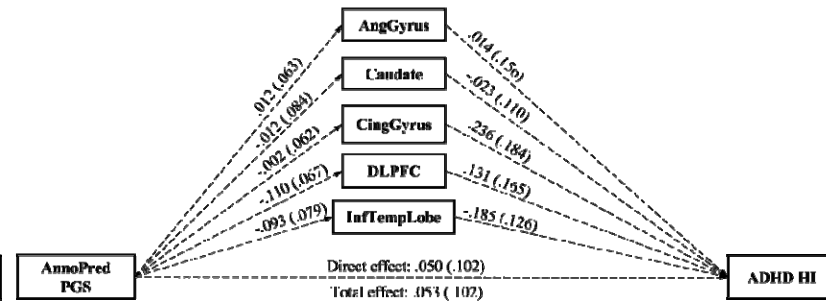

Figure 4. Multiple mediation paths between AnnoPred ADHD PGS and ADHD symptoms via brain regions in children, adolescents, and young adults in PNC
